# Supplementary material
Source: PubMed Central journal article supplement (PMC2964247)
Supplement: 1001192107_pnas.1001192107_SI.pdf [file 1001192107_pnas.1001192107_SI.pdf]

# Supporting Information

Yuen et al. 10.1073/pnas.1001192107

## SI Text

**Detailed Protocols. Cell culture and in vitro sprouting assay.** Human microvascular endothelial cells (HMVECs) were purchased from Lonza (CC-2543) and cultured to confluence at 37°C and 5% CO<sub>2</sub> in EGM-2MV medium (Lonza) containing all supplements. Angiogenic activity of endothelial cells was assessed using a modification of a widely used in vitro sprouting assay (1). Briefly, dextran beads microcarriers (Cytodex 3) with a dry weight of 50 mg were hydrated in PBS and autoclaved. The microcarriers were washed in EGM-2MV medium and seeded with  $3 \times 10^6$  HMVECs in a spinner flask. The microcarriers were stirred for 2 min out of 30 min for a total of 3 h at 37°C incubation. After 4 h, the beads and cells mixture were continuously stirred and incubated for an additional 20 h. The cell-coated beads were then seeded in fibrin gel in a 24-well plate. The composition of the fibrin gel in each well was 0.682 mg fibrinogen (Sigma, T3879), 11.4- $\mu$ g aprotinin (Sigma, A4529), 0.455 U thrombin (Sigma, T6884) in 393  $\mu$ L of PBS and 57  $\mu$ L of EGM2-MV. Media were changed every 24 h, and the cells were allowed to sprout from beads into surrounding gel over 4 d.

**Scaffold Fabrication.** Poly(lactic-co-glycolic) (PLG) microspheres (diameter = 5–100  $\mu$ m), prepared by standard double emulsion, were mixed with lyophilized proteins, sodium chloride, and 5% alginate by mass. The mixture was compressed into discs and equilibrated with high-pressure carbon dioxide. When the pressure was released, PLG particles expanded into spaces between salt particles and fused, entrapping the lyophilized proteins and salt. Salt particles were removed by leaching with a 100-mM

CaCl<sub>2</sub> solution to generate porous scaffolds. The VEGF-A isoform VEGF<sub>(165)</sub> (Biological Resources Branch of the National Cancer Institute) was used throughout these studies.

**Analysis of Vascularization.** Scaffolds and surrounding muscles were retrieved and fixed in Z fix (Anatech) overnight and changed into 70% EtOH for storage prior to histologic processing. Sections were immunostained with a monoclonal antibody raised against mouse CD31 (diluted 1:250) (PharMingen) with the Tyramide Signal Amplification (TSA) Biotin System (PerkinElmer Life Sciences). Briefly, deparaffinized sections were rehydrated, blocked for endogenous peroxidase activity and nonspecific interactions, and incubated overnight at 4°C with the primary CD31 antibody. Sections were then incubated with a biotinylated anti-rat IgG (Vector Laboratories), followed by application of a tertiary TSA streptavidin antibody and a TSA biotinyl tyramide amplification. This was followed by reapplication of the tertiary antibody. The samples were stained using 3,3' Diaminobenzidine substrate chromogen (DAKO) and counterstained with hematoxylin.

Sections from each sample were visualized at 10 $\times$  and 20 $\times$  objective magnifications with a Nikon light microscope connected to a SPOT digital image capture system (Diagnostic Instruments). Images were taken of entire sections at 20 $\times$  objective magnification and merged into a complete image of the section using Photomerge command of Photoshop Creative Suite 3 (Adobe Systems).

1. Crank J (1975) *The Mathematics of Diffusion* (Clarendon, Oxford, England), Vol viii, 2nd Ed.

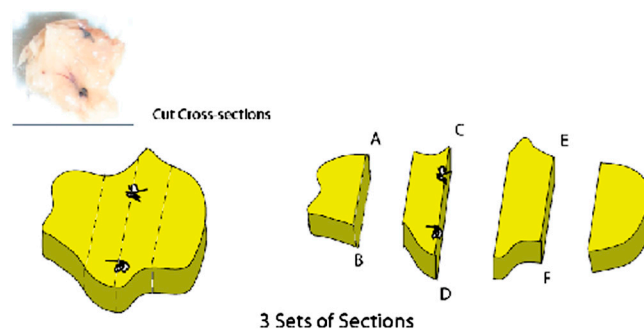

**Fig. S1.** During implantation, the central V layer was placed directly on top of the severed femoral artery and vein. When tissues were extracted, the sutures marking the ligation sites remained intact. The area adjacent to the V layer of the multilayer scaffold was the section cut directly along the line between the two sutures (C and D). The tissue areas adjacent to the side layers (A and B and E and F) were 1 mm away from C and D.
